# Supplementary material for: Developing a novel hybrid model for the estimation of surface 8-h ozone (O 3 ) across the remote Tibetan Plateau during 2005–2018
Source: Copernicus journal article supplement (doi:10.5194/acp-2019-972), 2020-01-14
Supplement: Supplementary file 1 [file acp-2019-972-supplement.pdf]

# ***Supplementary Information***

**Title:** Developing a novel hybrid model for the estimation of surface 8-h ozone (O<sub>3</sub>) across the remote Tibetan Plateau during 2005-2018

**Authors:** Rui Li<sup>a</sup>, Yilong Zhao<sup>a</sup>, Ya Meng<sup>a</sup>, Wenhui Zhou<sup>a</sup>, Ziyu Zhang<sup>a</sup>, Hongbo Fu<sup>a-c \*</sup>

**Affiliation:** <sup>a</sup> *Shanghai Key Laboratory of Atmospheric Particle Pollution and Prevention, Department of Environmental Science & Engineering, Institute of Atmospheric Sciences, Fudan University, Shanghai, 200433, P.R. China*

<sup>b</sup> *Collaborative Innovation Center of Atmospheric Environment and Equipment Technology (CICAET), Nanjing University of Information Science and Technology, Nanjing 210044, P.R. China*

<sup>c</sup> *Shanghai Institute of Pollution Control and Ecological Security, Shanghai 200092, P.R. China*

<sup>d</sup> *Department of Chemistry & Environmental Science, Tibet University, Lhasa 850000, China*

**\* Corresponding author**

[fuhb@fudan.edu.cn](mailto:fuhb@fudan.edu.cn)

Number of pages: 13

Number of texts: 1

Number of figures: 10

Number of tables: 1

### Text S1

We employed three statistical indicators of the coefficient of determination ( $R^2$ ), the rootmean-square error (RMSE), and the mean prediction error (MPE) to evaluate the model performance.

These indicators are calculated as follows:

$$R^2 = \frac{\sum_{i=1}^n (pre - \bar{pre})(obs - \bar{obs})}{\sqrt{\sum_{i=1}^n (pre - \bar{pre})^2} \sqrt{\sum_{i=1}^n (obs - \bar{obs})^2}} \quad (1)$$

$$RMSE = \sqrt{\frac{\sum_{i=1}^n (pre - obs)^2}{n}} \quad (2)$$

$$MPE = \frac{\sum_{i=1}^n |pre - obs|}{n} \quad (3)$$

where  $pre$  represents the predictive value,  $obs$  is the observation value, and  $n$  is the total number of data records.

**Fig. S1** The names and geographical locations of prefecture-level cities in Tibetan Plateau

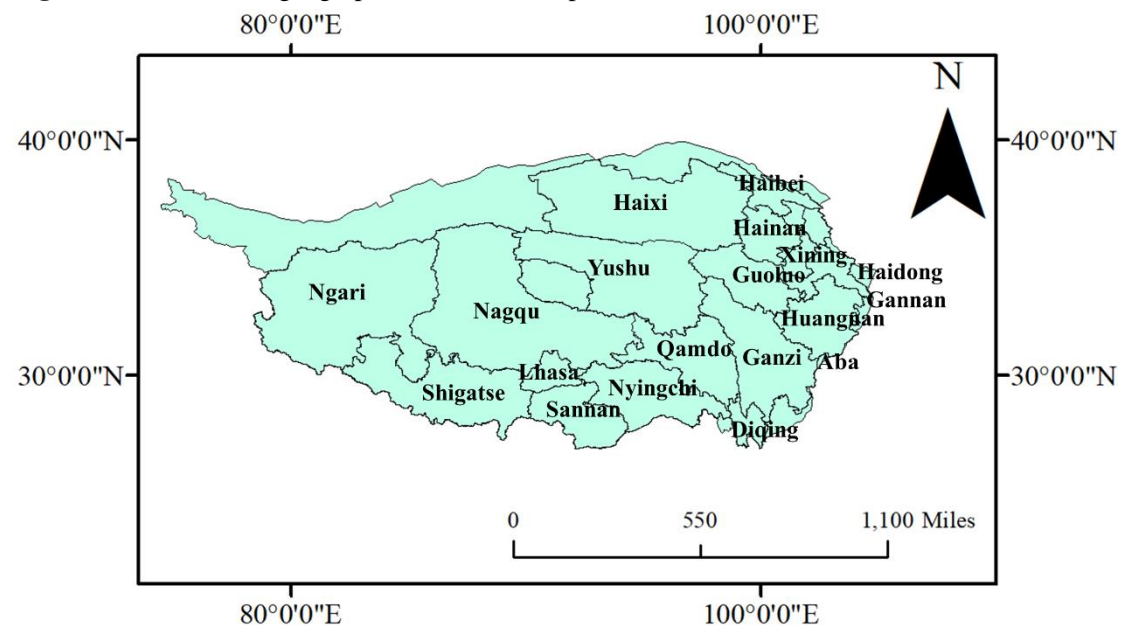

**Fig. S2** The annually mean O<sub>3</sub> column amount (Unit: DU) in Tibetan Plateau during 2005-2018.

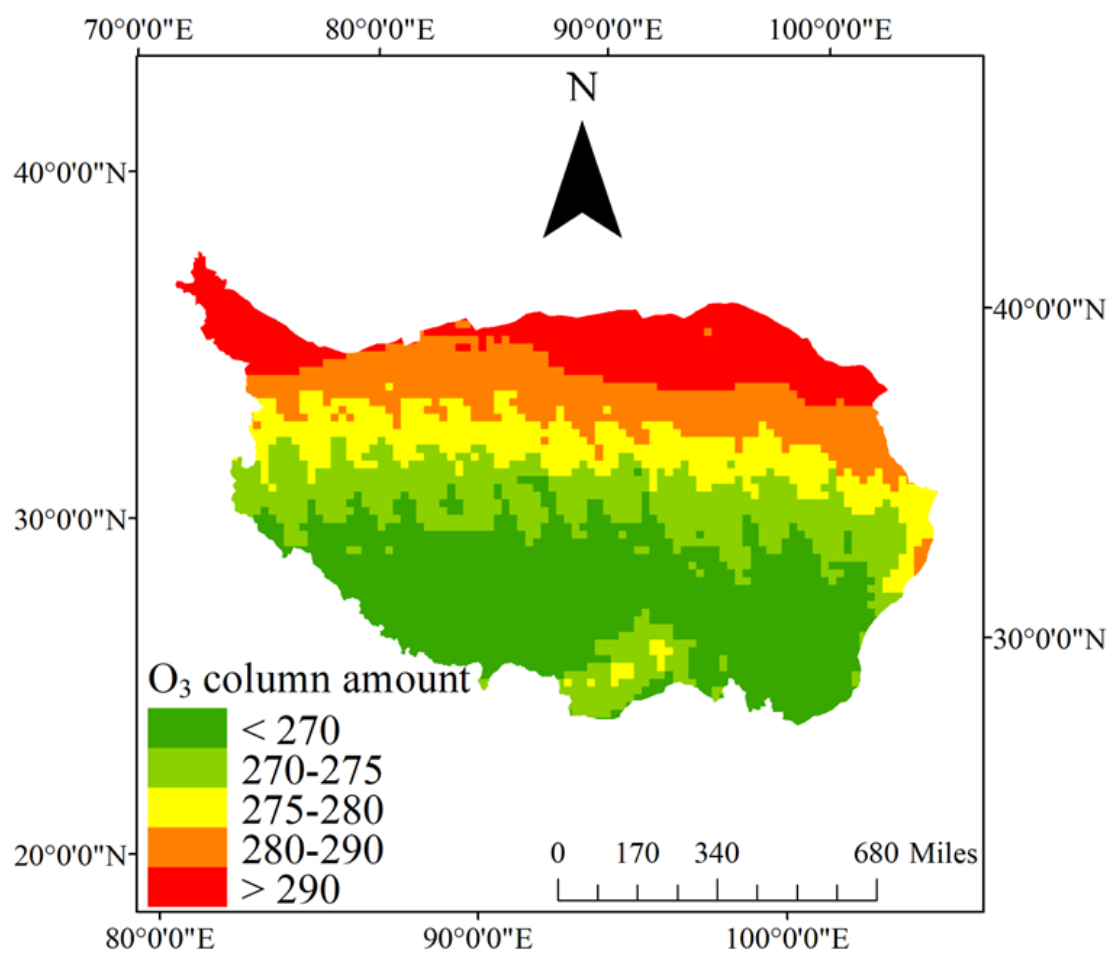

**Fig. S3** The mean VOC and NO<sub>x</sub> emissions (Unit: Mg) in Tibetan Plateau during 2005-2018.

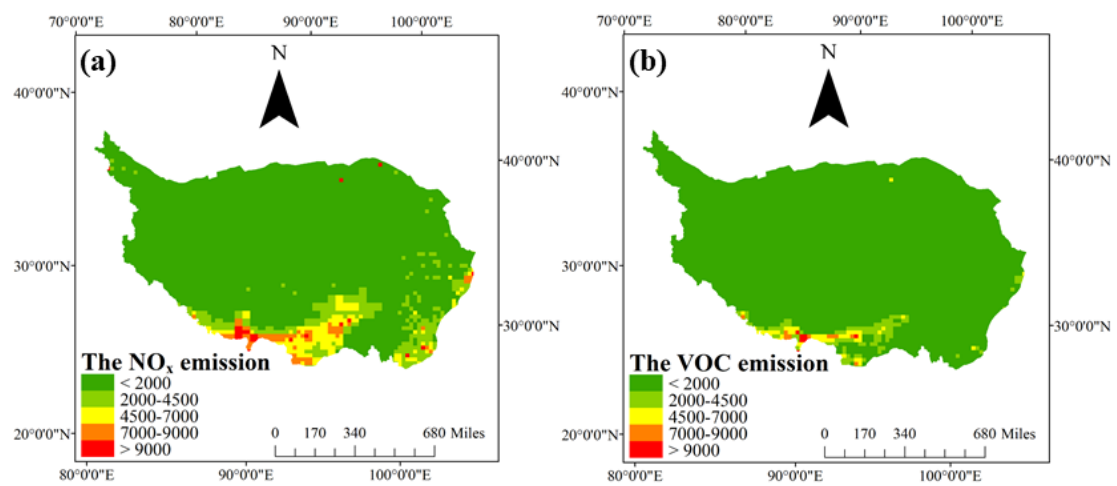

**Fig. S4** The annually mean values for key meteorological factors during 2005-2018.

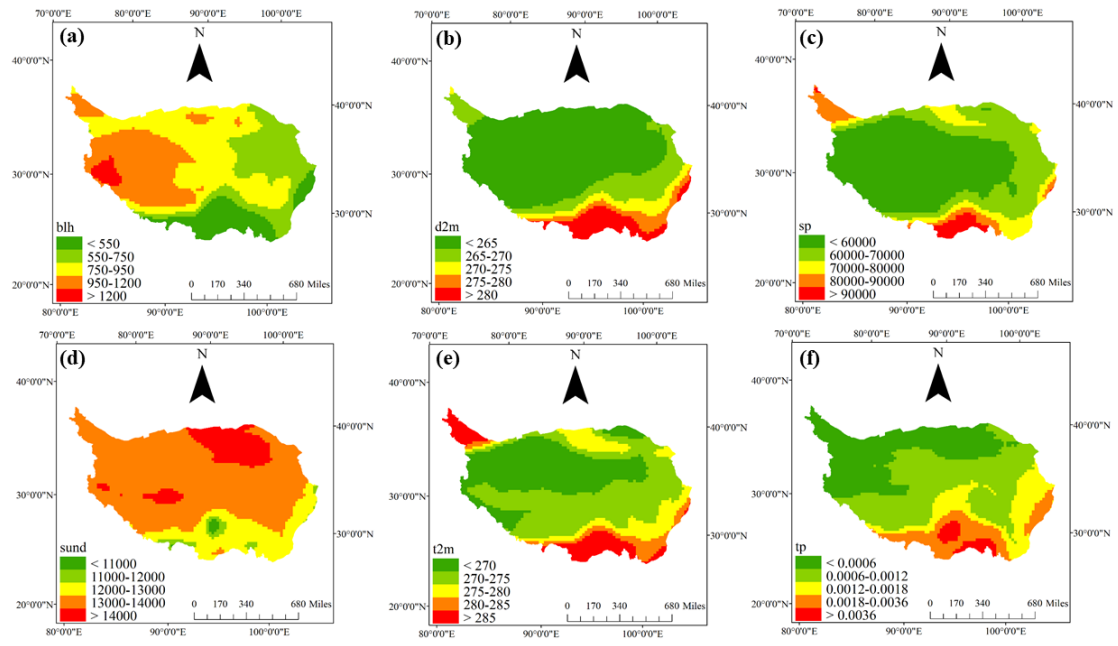

**Fig. S5** The mean values for blh in four seasons during 2005-2018.

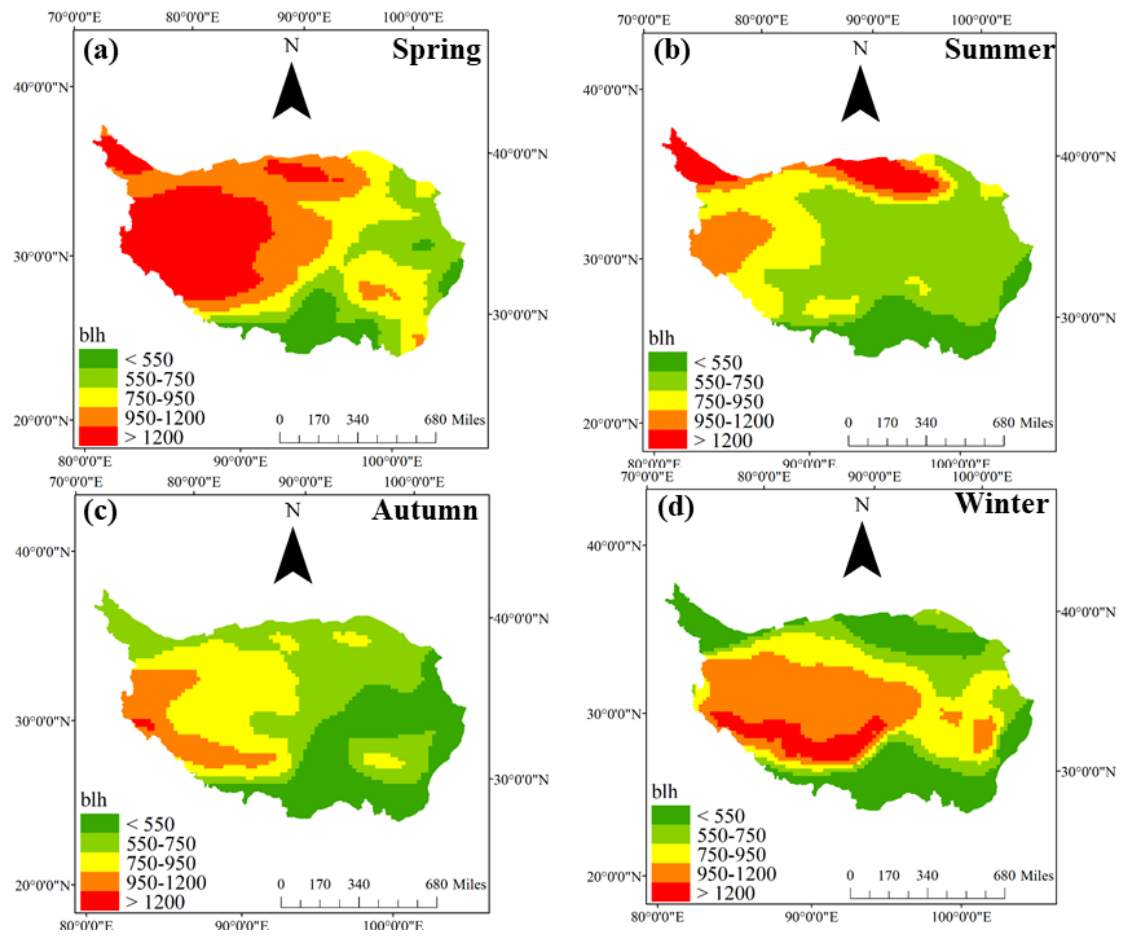

**Fig. S6** The mean values for d2m in four seasons during 2005-2018.

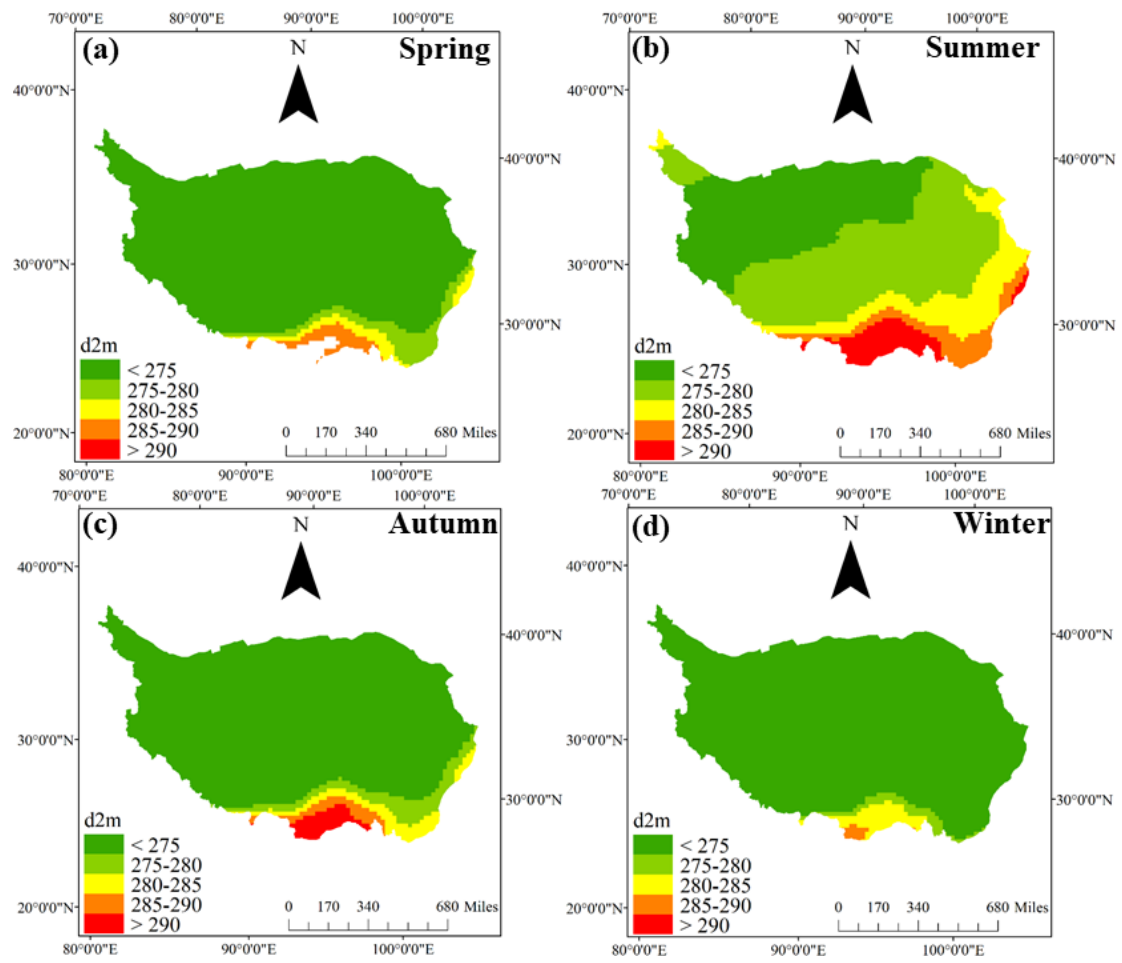



**Fig. S7** The mean values for sp in four seasons during 2005-2018.

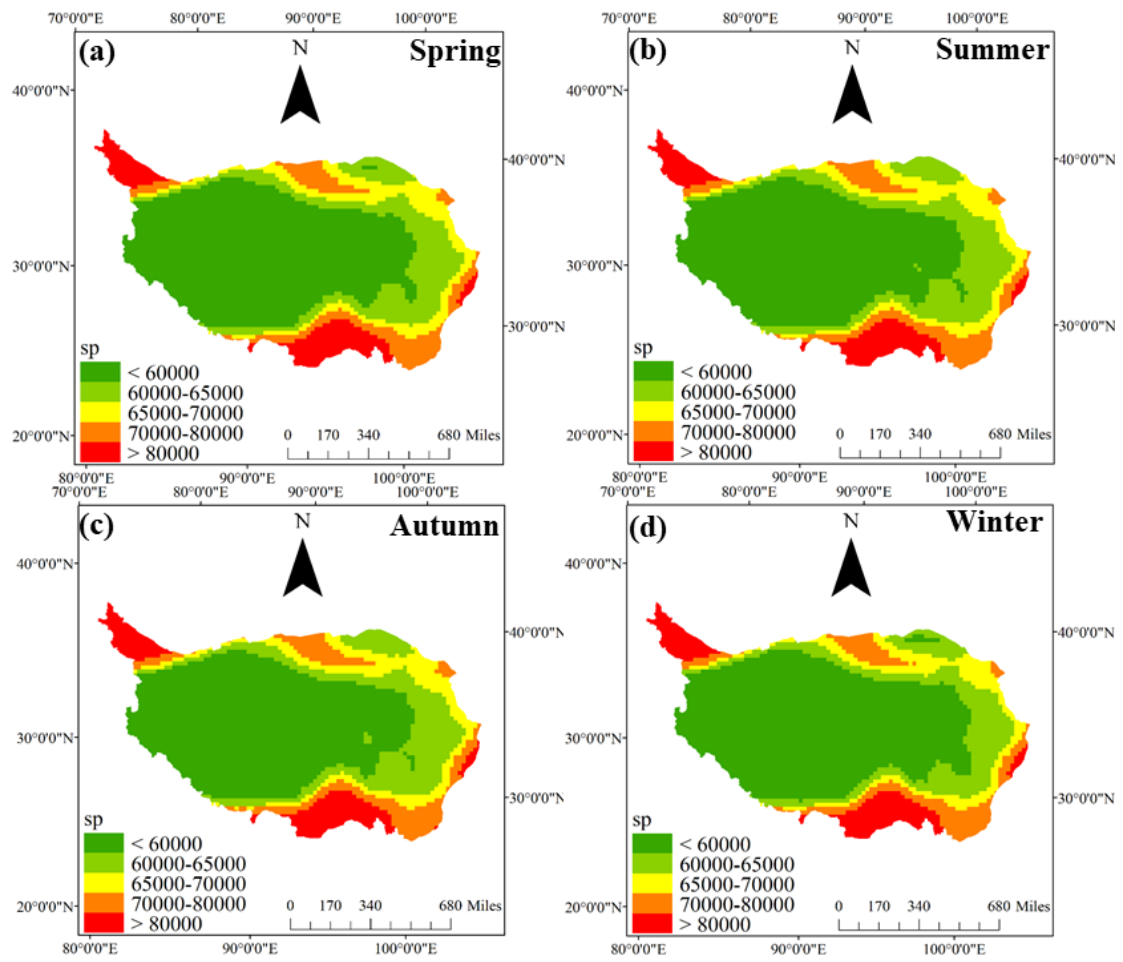

**Fig. S8** The mean values for sund in four seasons during 2005-2018.

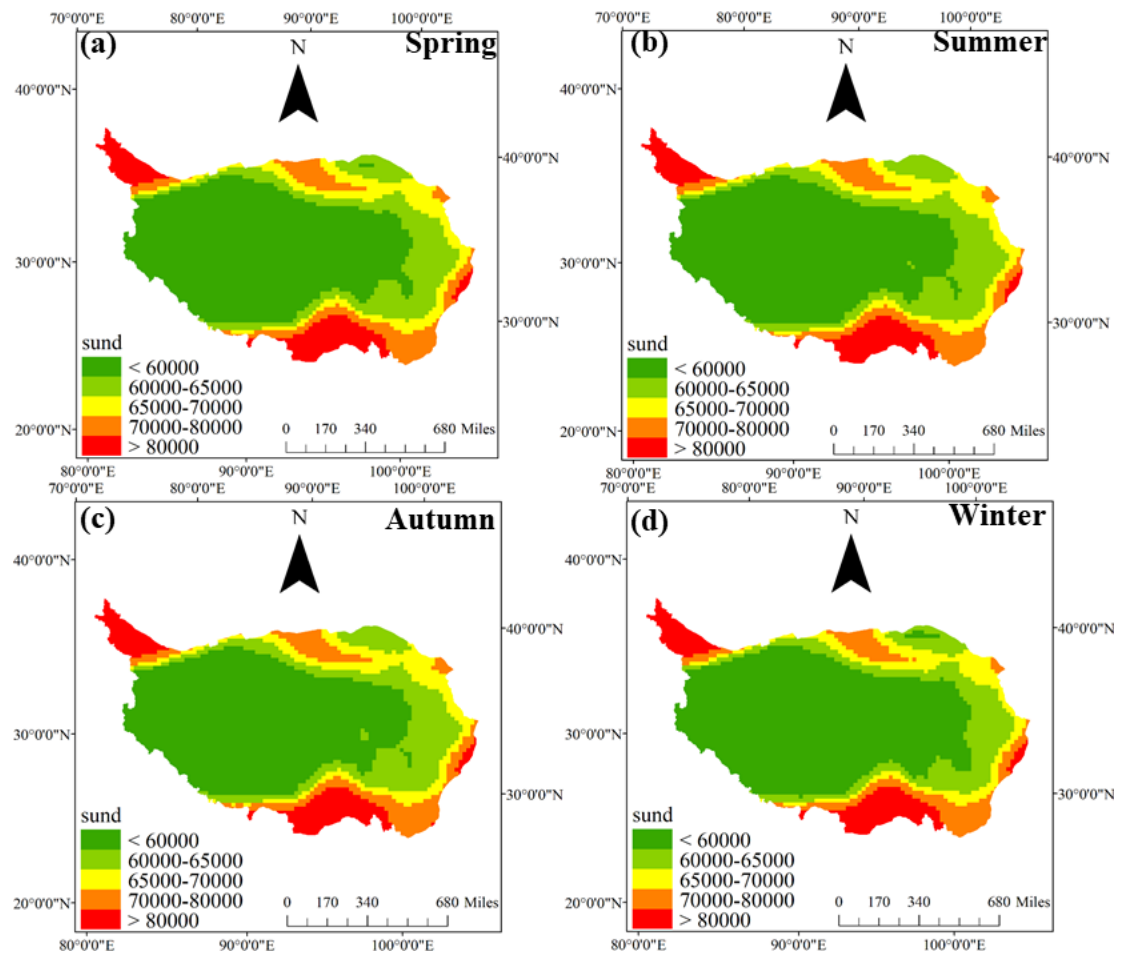

**Fig. S9** The mean values for t2m in four seasons during 2005-2018.

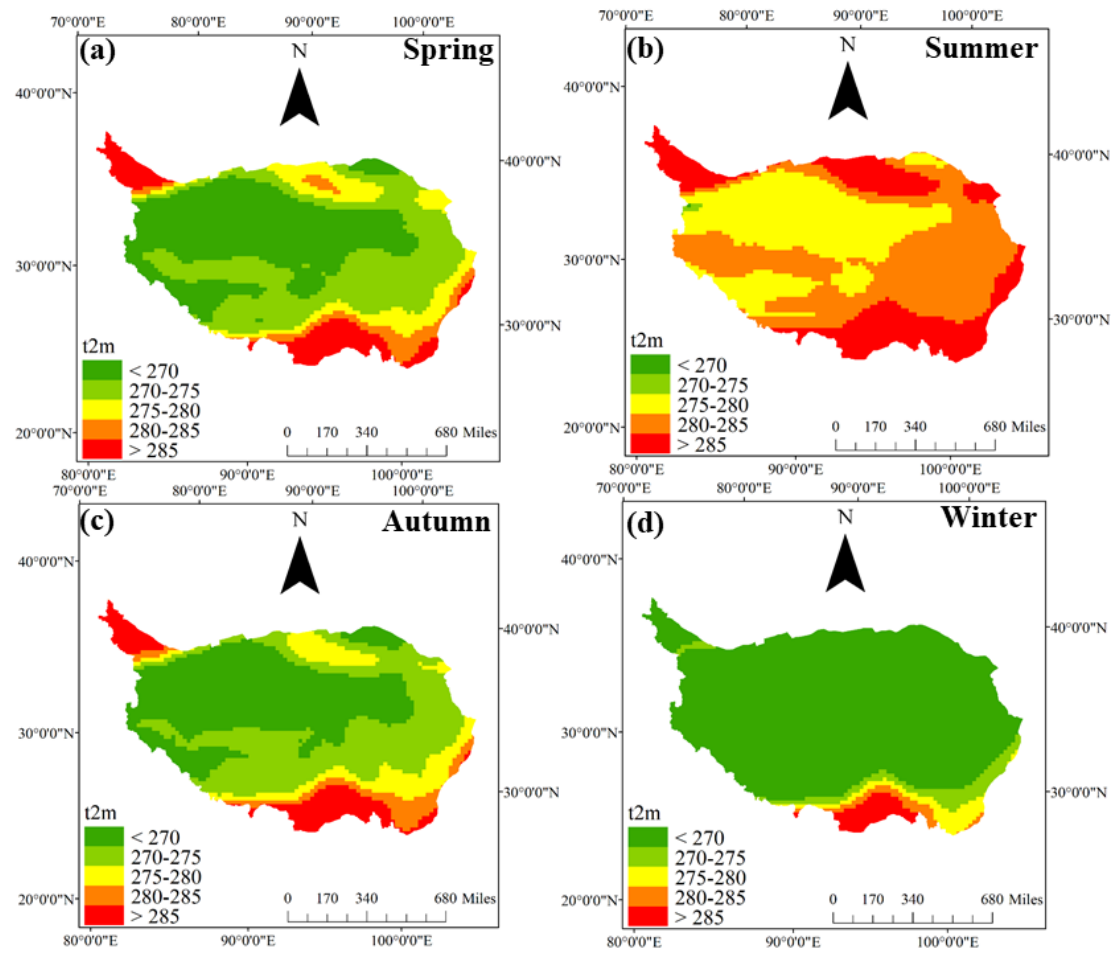

**Fig. S10** The mean values for tp in four seasons during 2005-2018.

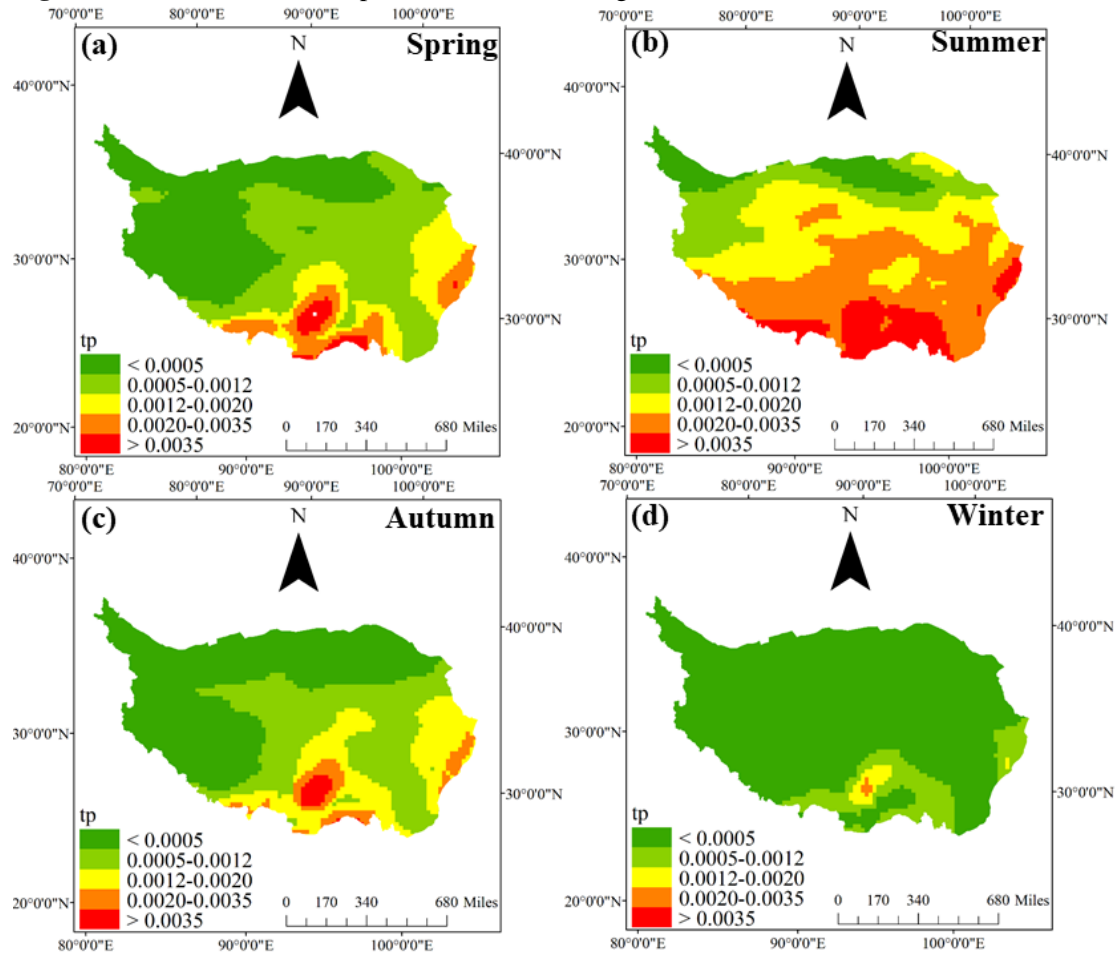

**Tab. S1** The NO<sub>x</sub> and VOC emissions (Unit: Mg) in four seasons over Tibetan Plateau

|                 | Spring      | Summer      | Autumn      | Winter      |
|-----------------|-------------|-------------|-------------|-------------|
| NO <sub>x</sub> | 92.74±5.52  | 90.69±5.21  | 91.64±5.34  | 95.24±5.65  |
| VOC             | 207.21±6.44 | 206.15±6.46 | 207.16±6.46 | 219.99±6.55 |
